# Supplementary material
Source: MDPI journal article supplement (https://www.mdpi.com/2079-6412/14/1/101)
Supplement: s1 [file s1 › coatings-2788248-supplementary.pdf]

# Monitoring aging effects in graphite bisulphates by Raman spectroscopy

Carlo Camerlingo, Marcella Salvatore, Gianfranco Carotenuto

## Supplementary Materials

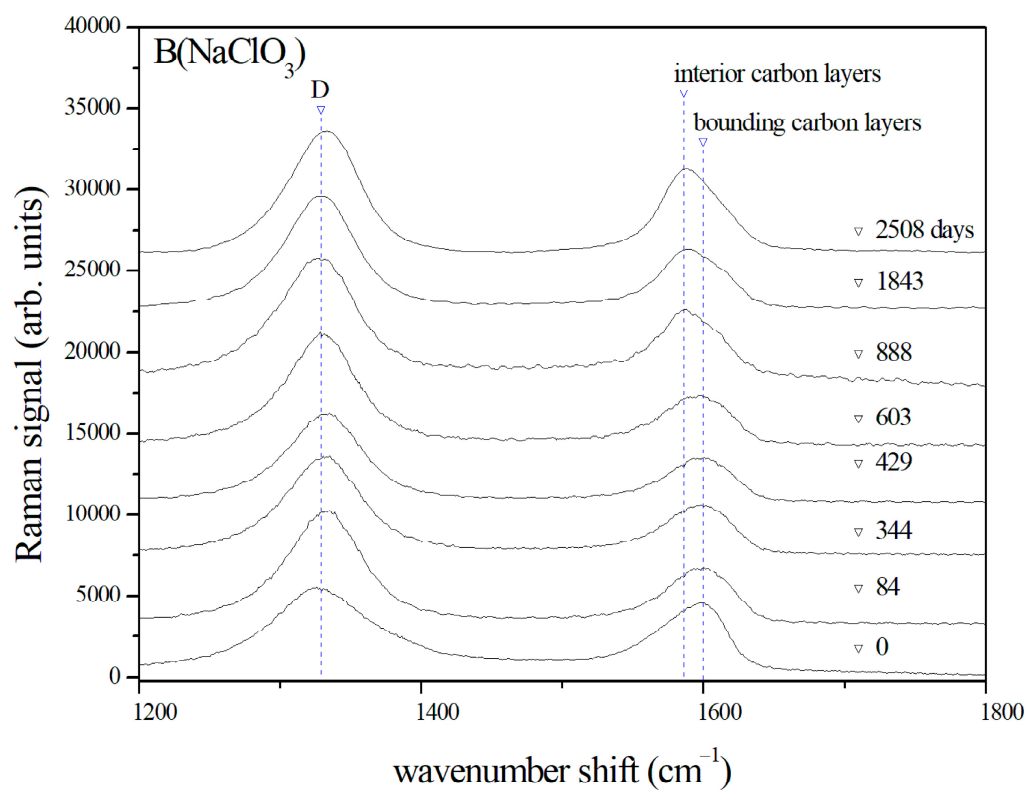

**Fig. S1** Effect of aging on the Raman response of the graphite bisulphate prepared with NaClO<sub>3</sub> as oxidizing component (sample B (NaClO<sub>3</sub>)). The Raman spectra have been collected on a fresh prepared sample (0) and after 3, 12, 14, 29, 30, 61, and 84 months of aging, respectively.

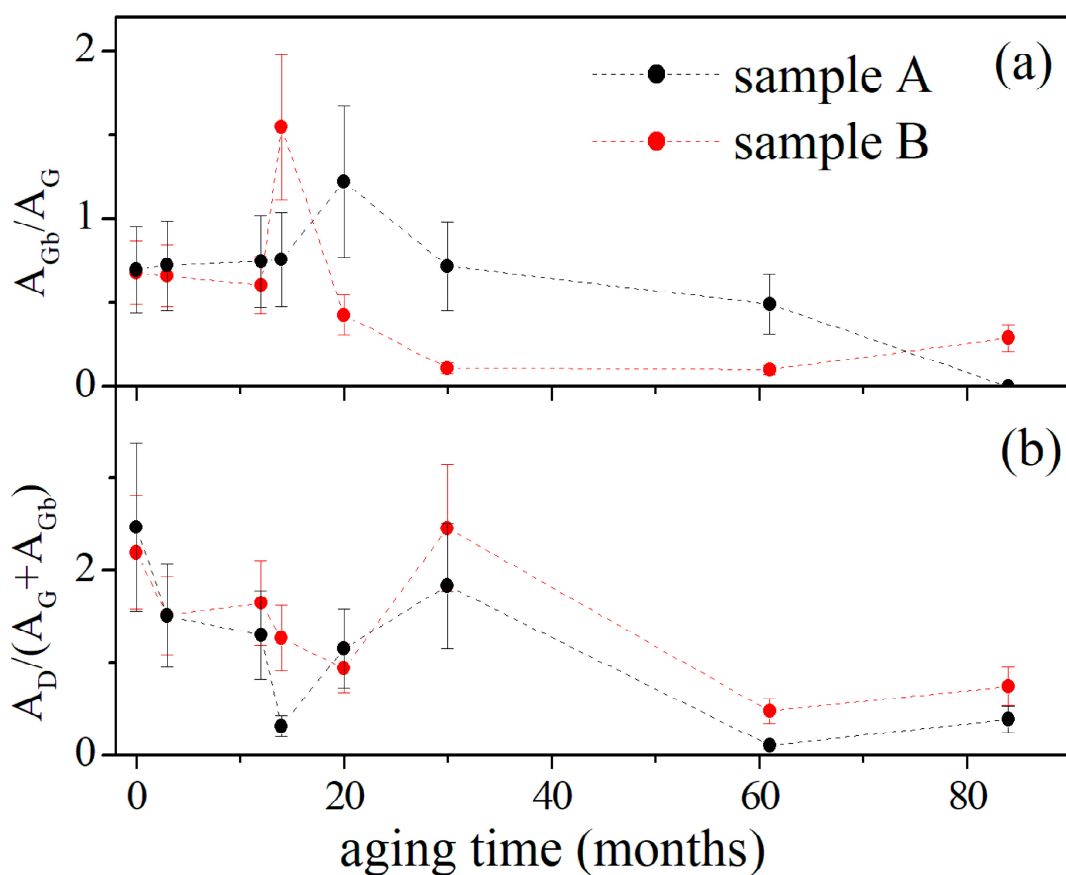

**Fig. S2** Effect of aging on the Raman response of the graphite bisulphates prepared with  $\text{HNO}_3$  (sample A, black dots and line) and  $\text{NaClO}_3$  (sample B, red dots and line) as oxidizing component. The time dependence of the  $A_{Gb}/A_G$  area ratio of the  $G_b$  and  $G$  mode peaks (a) and of the ratio of the  $D$  and  $G$  mode peaks (b) are reported.

**Table S1:** Effects of the aging on the  $A_D/A_G$  area ratio of D and G Raman modes and the width of G peak ( $\Gamma_G$ ). Data refer to GBS produced with different oxidation agents and have been used to estimate  $L_a$  and  $L_D$  parameters reported in Table 2 .  $E_L = 1.96$  eV is photon energy of the excitation laser.

| Sample | oxidizing agent                               | $(A_D/A_G)E_L^4$ (eV <sup>4</sup> ) |             | $\Gamma_G$ (cm <sup>-1</sup> ) |             |
|--------|-----------------------------------------------|-------------------------------------|-------------|--------------------------------|-------------|
|        |                                               | pristine                            | after aging | pristine                       | after aging |
| A      | HNO <sub>3</sub>                              | 34.5 ± 12.7                         | 27.9 ± 12.7 | 29.3 ± 3.8                     | 19.7 ± 1.8  |
| B      | NaClO <sub>3</sub>                            | 44.8 ± 2.2                          | 39.0 ± 14.7 | 46.9 ± 2.1                     | 23.8 ± 2.5  |
| C      | NaIO <sub>4</sub>                             | 41.9 ± 2.1                          | 38.8 ± 1.6  | 34.7 ± 1.5                     | 33.5 ± 1.5  |
| D      | KMnO <sub>4</sub>                             | 13.5 ± 1.7                          | 10.1 ± 1.9  | 17.2 ± 0.8                     | 17.4 ± 0.8  |
| E      | K <sub>2</sub> Cr <sub>2</sub> O <sub>7</sub> | 15.9 ± 2.5                          | 12.3 ± 4.8  | 16.0 ± 0.8                     | 16.1 ± 2.4  |
| F      | H <sub>2</sub> O <sub>2</sub>                 | 14.4 ± 9.2                          | 11.3 ± 4.5  | 15.4 ± 0.5                     | 17.6 ± 1.0  |
| G      | KNO <sub>3</sub>                              | 12.0 ± 4.3                          | 15.5 ± 4.5  | 20.2 ± 1.1                     | 19.0 ± 1.0  |
